# Supplementary material for: Genome-Based Analyses of Fitness Effects and Compensatory Changes Associated with Acquisition of blaCMY-, blaCTX-M-, and blaOXA-48/VIM-1-Containing Plasmids in Escherichia coli
Source: PubMed Central journal article supplement (PMC7832316; doi:10.3390/antibiotics10010090), 2021-01-19
Supplement: antibiotics-10-00090-s001.pdf [file antibiotics-10-00090-s001.pdf]

Pietsch et al., Supplementary Files

**Supplementary Table S1:** Characteristics of clinical donor strains and the corresponding transconjugants (Kx) used for fitness experiments.

| Isolate | Transconjugant <sup>1</sup> | Species              | Year of isolation | MLST/<br>Phylogenetic group <sup>2</sup> | Beta-lactamase gene                                                                                                                                                                                                      | bla plasmid [kb] <sup>3</sup> | Replicon type <sup>4</sup> |
|---------|-----------------------------|----------------------|-------------------|------------------------------------------|--------------------------------------------------------------------------------------------------------------------------------------------------------------------------------------------------------------------------|-------------------------------|----------------------------|
| 102/04  |                             | <i>E. coli</i>       | 2004              | D                                        | <i>bla</i> <sub>CMY-16</sub> , <i>bla</i> <sub>TEM-1</sub>                                                                                                                                                               | 160                           |                            |
|         | 102/04 K1                   | <i>E. coli</i>       |                   | A                                        | <i>bla</i> <sub>CMY-16</sub> , <i>bla</i> <sub>TEM-1</sub>                                                                                                                                                               | 160                           | IncA/C                     |
|         | 102/04 K2                   | <i>E. coli</i>       |                   | A                                        | <i>bla</i> <sub>CMY-16</sub> , <i>bla</i> <sub>TEM-1</sub>                                                                                                                                                               | 160                           | IncA/C                     |
| 151/09  |                             | <i>E. cloacae</i>    | 2009              |                                          | <i>bla</i> <sub>VIM-1</sub>                                                                                                                                                                                              | 100                           |                            |
|         | 151/09 K2                   | <i>E. coli</i>       |                   | A                                        |                                                                                                                                                                                                                          | 100                           | IncN/IncR                  |
| 17/11   |                             | <i>E. coli</i>       | 2011              | B1                                       | <i>bla</i> <sub>KPC-2</sub>                                                                                                                                                                                              | 210, 190, 85, 65              |                            |
|         | 17/11 K1                    | <i>E. coli</i>       |                   | A                                        | <i>bla</i> <sub>KPC-2</sub>                                                                                                                                                                                              | 190                           | IncA/C                     |
| 252/09  |                             | <i>E. coli</i>       | 2009              |                                          | <i>bla</i> <sub>CMY-2</sub> , <i>bla</i> <sub>TEM-1</sub>                                                                                                                                                                | 85, 60, 30                    | IncI1, IncFII              |
|         | 252/09 K3                   | <i>E. coli</i>       |                   | A                                        | <i>bla</i> <sub>CMY-2</sub>                                                                                                                                                                                              | 85, 60                        | IncI1, IncFII              |
| 346/12  |                             | <i>K. pneumoniae</i> | 2012              |                                          | <i>bla</i> <sub>OXA-48</sub> , <i>bla</i> <sub>OXA-1</sub> , <i>bla</i> <sub>OXA-9</sub>                                                                                                                                 | 105, 60, 35                   | IncL/M-1                   |
|         | 346/12 K2                   | <i>E. coli</i>       |                   | A                                        | <i>bla</i> <sub>OXA-48</sub>                                                                                                                                                                                             | 60                            | IncL/M-1                   |
| 370/12  |                             | <i>K. oxytoca</i>    | 2012              |                                          | <i>bla</i> <sub>VIM-1</sub> , <i>bla</i> <sub>OXA</sub> ,                                                                                                                                                                | 250, 150, 100                 | IncFIB, IncL/M-1           |
|         | 370/12 K2                   | <i>E. coli</i>       |                   | A                                        | <i>bla</i> <sub>VIM-1</sub>                                                                                                                                                                                              | 250                           | IncFIB                     |
| 384/13  |                             | <i>K. pneumoniae</i> | 2013              |                                          | <i>bla</i> <sub>NDM-1</sub> , <i>bla</i> <sub>SHV-like</sub> , <i>bla</i> <sub>CTX-M-15</sub> , <i>bla</i> <sub>OXA-232</sub> ,<br><i>bla</i> <sub>OXA-1</sub> , <i>bla</i> <sub>OXA-9</sub> , <i>bla</i> <sub>TEM</sub> | 240, 110                      | IncFII, IncI1,<br>IncN?    |
|         | 384/13 K2                   | <i>E. coli</i>       |                   | A                                        | <i>bla</i> <sub>NDM</sub> , <i>bla</i> <sub>CTX-M-15</sub> , <i>bla</i> <sub>OXA-9</sub> , <i>bla</i> <sub>TEM-1</sub>                                                                                                   | 110                           | IncFII                     |
| 467/13  |                             | <i>K. pneumoniae</i> |                   |                                          | <i>bla</i> <sub>OXA-48</sub>                                                                                                                                                                                             | 60                            | IncL/M-1                   |
|         | 467/13 K2                   | <i>E. coli</i>       |                   | A                                        | <i>bla</i> <sub>OXA-48</sub>                                                                                                                                                                                             | 60                            |                            |
| 531/12  |                             | <i>E. coli</i>       |                   |                                          | <i>bla</i> <sub>CMY-2</sub>                                                                                                                                                                                              | 190, 90, 55                   | IncI1                      |
|         | 531/12 K2                   | <i>E. coli</i>       |                   | A                                        |                                                                                                                                                                                                                          | 90                            | IncI1                      |
| 656/13  |                             | <i>E. coli</i>       |                   |                                          | <i>bla</i> <sub>SHV-12</sub>                                                                                                                                                                                             | 140, 105                      |                            |
|         | 656/13 K2                   | <i>E. coli</i>       |                   | A                                        | <i>bla</i> <sub>SHV-12</sub>                                                                                                                                                                                             | 105                           | IncI1                      |
| RS014   | negative                    | <i>E. coli</i>       | 2010              | ST131                                    | <i>bla</i> <sub>CTX-M-15</sub>                                                                                                                                                                                           |                               |                            |
| RS039   |                             | <i>E. coli</i>       | 2011              | ST46                                     | <i>bla</i> <sub>CTX-M-1</sub> ,<br><i>bla</i> <sub>TEM-1</sub>                                                                                                                                                           | 80                            | IncI1                      |
|         | RS039 K1                    | <i>E. coli</i>       |                   | A                                        | <i>bla</i> <sub>CTX-M-1</sub>                                                                                                                                                                                            |                               | IncI1                      |
| RS060   | negative                    | <i>E. coli</i>       | 2011              | ST131                                    | <i>bla</i> <sub>CTX-M-27</sub>                                                                                                                                                                                           |                               |                            |
| RS135   | negative                    | <i>E. coli</i>       | 2011              | ST410                                    | <i>bla</i> <sub>CTX-M-15</sub>                                                                                                                                                                                           |                               |                            |
| RS081   | negative                    | <i>E. coli</i>       | 2011              | D                                        | <i>bla</i> <sub>CTX-M-1</sub> , <i>bla</i> <sub>TEM-1</sub>                                                                                                                                                              | 90                            | IncI1                      |
| RS165   |                             | <i>E. coli</i>       | 2011              | ST73                                     | <i>bla</i> <sub>CTX-M-14</sub>                                                                                                                                                                                           |                               |                            |
|         | RS165 K1                    |                      |                   |                                          | <i>bla</i> <sub>CTX-M-14</sub>                                                                                                                                                                                           | 70                            | IncFII                     |
| RS292   |                             | <i>E. coli</i>       | 2012              | D                                        | <i>bla</i> <sub>CTX-M-15</sub> , <i>bla</i> <sub>TEM-1</sub>                                                                                                                                                             |                               | IncFII                     |
|         | RS292 K1                    | <i>E. coli</i>       |                   | A                                        | <i>bla</i> <sub>CTX-M-15</sub> , <i>bla</i> <sub>TEM-1</sub>                                                                                                                                                             |                               | IncFII                     |
| 104/15  |                             | <i>E. coli</i>       | 2015              | B2, rfbO25 negative                      | <i>bla</i> <sub>CTX-M-15</sub>                                                                                                                                                                                           | 77                            | IncF                       |

| Isolate | Transconjugant <sup>1</sup> | Species        | Year of isolation | MLST/<br>Phylogenetic group <sup>2</sup> | Beta-lactamase gene                                          | <i>bla</i> plasmid [kb] <sup>3</sup> | Replicon type <sup>4</sup> |
|---------|-----------------------------|----------------|-------------------|------------------------------------------|--------------------------------------------------------------|--------------------------------------|----------------------------|
|         | 104/15 K3                   | <i>E. coli</i> |                   | A                                        | <i>bla</i> <sub>CTX-M-15</sub>                               | 77                                   | IncFII                     |
| RS013   | negative                    | <i>E. coli</i> | 2010              | ST131                                    | <i>bla</i> <sub>CTX-M-15</sub>                               |                                      |                            |
| RS014   | negative                    | <i>E. coli</i> | 2010              | ST131                                    | <i>bla</i> <sub>CTX-M-15</sub>                               |                                      |                            |
| RS025   | negative                    | <i>E. coli</i> | 2011              | ST131                                    | <i>bla</i> <sub>CTX-M-15</sub>                               |                                      |                            |
| RS029   | negative                    | <i>E. coli</i> | 2011              | ST131                                    | <i>bla</i> <sub>CTX-M-15</sub>                               |                                      |                            |
| RS031   | negative                    | <i>E. coli</i> | 2011              | ST131                                    | <i>bla</i> <sub>CTX-M-15</sub>                               |                                      |                            |
| RS050   | negative                    | <i>E. coli</i> | 2011              | ST131                                    | <i>bla</i> <sub>CTX-M-15</sub>                               |                                      |                            |
| RS062   | negative                    | <i>E. coli</i> | 2011              | ST131                                    | <i>bla</i> <sub>CTX-M-15</sub>                               |                                      |                            |
| RS071   | negative                    | <i>E. coli</i> | 2011              | ST131                                    | <i>bla</i> <sub>CTX-M-15</sub>                               |                                      |                            |
| RS072   | negative                    | <i>E. coli</i> | 2011              | ST131                                    | <i>bla</i> <sub>CTX-M-15</sub>                               |                                      |                            |
| RS080   | negative                    | <i>E. coli</i> | 2011              | ST131                                    | <i>bla</i> <sub>CTX-M-15</sub>                               |                                      |                            |
| RS090   | negative                    | <i>E. coli</i> | 2011              | ST131                                    | <i>bla</i> <sub>CTX-M-15</sub>                               |                                      |                            |
| RS093   | negative                    | <i>E. coli</i> | 2011              | ST131                                    | <i>bla</i> <sub>CTX-M-15</sub>                               |                                      |                            |
| RS098   | negative                    | <i>E. coli</i> | 2011              | ST131                                    | <i>bla</i> <sub>CTX-M-15</sub>                               |                                      |                            |
| RS099   | negative                    | <i>E. coli</i> | 2011              | ST131                                    | <i>bla</i> <sub>CTX-M-15</sub>                               |                                      |                            |
| RS103   | negative                    | <i>E. coli</i> | 2011              | ST131                                    | <i>bla</i> <sub>CTX-M-15</sub>                               |                                      |                            |
| RS104   | negative                    | <i>E. coli</i> | 2011              | ST131                                    | <i>bla</i> <sub>CTX-M-15</sub>                               |                                      |                            |
| RS106   | negative                    | <i>E. coli</i> | 2011              | ST131                                    | <i>bla</i> <sub>CTX-M-15</sub>                               |                                      |                            |
| RS107   | negative                    | <i>E. coli</i> | 2011              | ST131                                    | <i>bla</i> <sub>CTX-M-15</sub>                               |                                      |                            |
| RS113   | negative                    | <i>E. coli</i> | 2011              | ST131                                    | <i>bla</i> <sub>CTX-M-15</sub>                               |                                      |                            |
| RS115   | negative                    | <i>E. coli</i> | 2011              | ST131                                    | <i>bla</i> <sub>CTX-M-15</sub>                               |                                      |                            |
| RS127   | negative                    | <i>E. coli</i> | 2011              | ST131                                    | <i>bla</i> <sub>CTX-M-15</sub>                               |                                      |                            |
| RS134   | negative                    | <i>E. coli</i> | 2011              | ST131                                    | <i>bla</i> <sub>CTX-M-15</sub>                               |                                      |                            |
| RS137   | negative                    | <i>E. coli</i> | 2011              | ST131                                    | <i>bla</i> <sub>CTX-M-15</sub>                               |                                      |                            |
| RS143   | negative                    | <i>E. coli</i> | 2011              | ST131                                    | <i>bla</i> <sub>CTX-M-15</sub> , <i>bla</i> <sub>TEM-1</sub> |                                      |                            |
| RS184   | negative                    | <i>E. coli</i> | 2011              | ST131                                    | <i>bla</i> <sub>CTX-M-15</sub>                               |                                      |                            |

Legend: <sup>1</sup> recipient *E. coli* K J53 Azi<sup>r</sup> was used in mating experiments, <sup>2</sup> PCR-based determination of *E. coli* phylogenetic group (Clermont O, Bonacorsi S, Bingen E. Rapid and simple determination of the *Escherichia coli* phylogenetic group. Appl Environ Microbiol. 2000;66(8):4555) and determination of sequence type (ST) by multilocus sequence typing ([https://pubmlst.org/bigsubdb?db=pubmlst\\_ecoli\\_achtman\\_seqdef](https://pubmlst.org/bigsubdb?db=pubmlst_ecoli_achtman_seqdef)), <sup>3</sup> sizes of plasmids that contained the beta-lactamase (*bla*) gene of interest (printed in bold) were determined by S1 nuclease treatment and subsequent PFGE analyses, <sup>4</sup> PCR based replicon typing using the PRBT kit (Diatheva, Cartoceto, Italy).

**Supplementary Table S2:** Fitness values of the initial and evolved transconjugants from long-term growth experiments. Fitness values of the initial transconjugants relative to the fitness of the recipient *E. coli* J53 Azir<sup>(1)</sup> is given as generation G<sub>0</sub>, values of the evolved transconjugants are presented for generations G<sub>0</sub>, G<sub>200</sub>, and G<sub>500</sub>. The numbers of repeated experiments (*n* attempts) and the standard deviations (SD) are given.

| Isolate     | Generation G <sub>0</sub><br>relative fitness [%]<br>Average value<br>( <i>n</i> attempts)    SD |      | Generation G <sub>200</sub><br>relative fitness [%]<br>Average value<br>( <i>n</i> attempts)    SD |      | Generation G <sub>500</sub><br>relative fitness [%]<br>Average value<br>( <i>n</i> attempts)    SD |      |
|-------------|--------------------------------------------------------------------------------------------------|------|----------------------------------------------------------------------------------------------------|------|----------------------------------------------------------------------------------------------------|------|
|             | J53 <sup>1</sup>                                                                                 | 100  |                                                                                                    |      |                                                                                                    |      |
| J53-1       |                                                                                                  |      | 102.03 (2)                                                                                         | 0.36 | 96.87 (3)                                                                                          | 1.86 |
| J53-2       |                                                                                                  |      | 101.31 (2)                                                                                         | 0.31 | 93.54 (3)                                                                                          | 1.31 |
| J53-3       |                                                                                                  |      | bdl (2)                                                                                            |      | 94.68 (3)                                                                                          | 1.78 |
| J53-4       |                                                                                                  |      | 102.81 (2)                                                                                         | 2.77 | 97.41 (3)                                                                                          | 2.20 |
| RS165K1     | 98.47 (8)                                                                                        | 1.76 |                                                                                                    |      |                                                                                                    |      |
| RS165 K1-1  |                                                                                                  |      | 113.19 (2)                                                                                         | 2.85 | 99.08 (3)                                                                                          | 1.12 |
| RS165 K1-2  |                                                                                                  |      | bdl (2)                                                                                            |      | 99.95 (3)                                                                                          | 0.55 |
| RS165 K1-3  |                                                                                                  |      | 101.29 (2)                                                                                         | 0.83 | 99.11 (3)                                                                                          | 3.25 |
| RS165 K1-4  |                                                                                                  |      | 112.63 (2)                                                                                         | 3.18 | 97.66 (3)                                                                                          | 2.18 |
| 102/04 K1   | 107.23 (4)                                                                                       | 2.29 |                                                                                                    |      |                                                                                                    |      |
| 102/04 K1-1 |                                                                                                  |      | 110.38 (2)                                                                                         | 1.09 | 99.04 (3)                                                                                          | 1.49 |
| 102/04 K1-2 |                                                                                                  |      | 96.16 (2)                                                                                          | 0.65 | 102.68 (3)                                                                                         | 3.63 |
| 102/04 K1-3 |                                                                                                  |      | 99.46 (1)                                                                                          |      | 98.89 (3)                                                                                          | 1.78 |
| 102/04 K1-4 |                                                                                                  |      | 100.49 (1)                                                                                         |      | 102.10 (3)                                                                                         | 2.33 |
| 102/04 K2   | 95.58 (3)                                                                                        | 0.71 |                                                                                                    |      |                                                                                                    |      |
| 102/04 K2-1 |                                                                                                  |      | 96.81 (2)                                                                                          | 0.19 | 88.07 (3)                                                                                          | 3.24 |
| 102/04 K2-2 |                                                                                                  |      | 97.99 (2)                                                                                          | 0.64 | 104.53 (3)                                                                                         | 0.57 |
| 102/04 K2-3 |                                                                                                  |      | 101.66 (1)                                                                                         |      | 102.09 (3)                                                                                         | 1.42 |
| 102/04 K2-4 |                                                                                                  |      | 99.89 (1)                                                                                          |      | 94.75 (3)                                                                                          | 0.60 |
| 252/09 K3   | 98.70 (3)                                                                                        | 1.45 |                                                                                                    |      |                                                                                                    |      |
| 252/09 K3-1 |                                                                                                  |      | 101.68 (1)                                                                                         |      | 92.69 (3)                                                                                          | 1.07 |
| 252/09 K3-2 |                                                                                                  |      | 101.39 (1)                                                                                         |      | 95.65 (3)                                                                                          | 2.12 |
| 252/09 K3-3 |                                                                                                  |      | 103.23 (1)                                                                                         |      | 93.49 (3)                                                                                          | 0.35 |
| 252/09 K3-4 |                                                                                                  |      | 93.57 (1)                                                                                          |      | 97.86 (3)                                                                                          | 2.02 |
| 151/09 K2   | 96.30 (3)                                                                                        | 0.76 |                                                                                                    |      |                                                                                                    |      |
| 151/09 K2-1 |                                                                                                  |      | 89.81 (1)                                                                                          |      | 100.37 (3)                                                                                         | 1.42 |
| 151/09 K2-2 |                                                                                                  |      | 93.74 (1)                                                                                          |      | 97.60 (3)                                                                                          | 0.58 |
| 151/09 K2-3 |                                                                                                  |      | 95.21 (1)                                                                                          |      | 92.42 (3)                                                                                          | 0.65 |
| 151/09 K2-4 |                                                                                                  |      | 90.82 (1)                                                                                          |      | 95.59 (3)                                                                                          | 1.36 |
| 104/15 K3   | 100.74 (3)                                                                                       | 0.25 |                                                                                                    |      |                                                                                                    |      |
| 104/15 K3-1 |                                                                                                  |      | 102.09 (2)                                                                                         | 1.21 | 99.16 (3)                                                                                          | 1.46 |
| 104/15 K3-2 |                                                                                                  |      | 101.26 (2)                                                                                         | 1.51 | 97.99 (3)                                                                                          | 1.40 |
| 104/15 K3-3 |                                                                                                  |      | 100.01 (2)                                                                                         | 1.80 | 99.58 (3)                                                                                          | 2.38 |
| 104/15 K3-4 |                                                                                                  |      | 100.70 (2)                                                                                         | 1.81 | 95.20 (3)                                                                                          | 1.93 |
| 346/12 K2   | 97.88 (3)                                                                                        | 0.84 |                                                                                                    |      |                                                                                                    |      |
| 346/12 K2-1 |                                                                                                  |      | 96.17 (1)                                                                                          |      | 87.19 (3)                                                                                          | 1.70 |
| 346/12 K2-2 |                                                                                                  |      | 97.60 (1)                                                                                          |      | 83.70 (3)                                                                                          | 0.60 |
| 346/12 K2-3 |                                                                                                  |      | 95.86 (1)                                                                                          |      | 84.05 (2)                                                                                          | 1.36 |
| 346/12 K2-4 |                                                                                                  |      | 95.50 (1)                                                                                          |      | 88.07 (3)                                                                                          | 1.40 |
| RS039 K1*   | 99.02 (8)                                                                                        | 2.15 |                                                                                                    |      |                                                                                                    |      |
| RS292K1*    | 100.02 (8)                                                                                       | 1.93 |                                                                                                    |      |                                                                                                    |      |
| 17/11K1*    | 99.76 (4)                                                                                        | 1.52 |                                                                                                    |      |                                                                                                    |      |
| 370/12K1*   | 100.82 (5)                                                                                       | 1.46 |                                                                                                    |      |                                                                                                    |      |
| 384/13K2*   | 100.01 (4)                                                                                       | 2.33 |                                                                                                    |      |                                                                                                    |      |
| 656/13 K2*  | 98.47 (3)                                                                                        | 0.84 |                                                                                                    |      |                                                                                                    |      |
| 531/12 K2*  | 98.34 (3)                                                                                        | 0.16 |                                                                                                    |      |                                                                                                    |      |

Legend: bdl = below detection limit; \*isolates not selected for further analyses

**Supplementary Table S3:** Antibiotic susceptibilities (MICs in mg/L) of transconjugants of the different generations, detected by broth microdilution (EUCAST v10.0; [https://www.eu-cast.org/clinical\\_breakpoints/](https://www.eu-cast.org/clinical_breakpoints/)).

| Isolate          | AMP | CTA | CTZ | CXI <sup>1</sup> | GEN  | KAN <sup>1</sup> | AMI | STR <sup>1</sup> | NAL <sup>1</sup> | CMP | CIP    | MER    | TRS  |
|------------------|-----|-----|-----|------------------|------|------------------|-----|------------------|------------------|-----|--------|--------|------|
| <b>102/04 K1</b> | >16 | >16 | >32 | >32              | 1    | >32              | >32 | >64              | 16               | >32 | ≤0.063 | ≤0.063 | >128 |
| <b>G200 -1</b>   | >16 | 16  | 32  | >32              | ≤0.5 | >32              | 16  | 64               | 8                | >32 | ≤0.063 | ≤0.063 | >128 |
| <b>G200 -2</b>   | >16 | 8   | 16  | 16               | ≤0.5 | >32              | 8   | 16               | 16               | >32 | ≤0.063 | ≤0.063 | >128 |
| <b>G200 -5</b>   | >16 | >16 | >32 | >32              | 4    | >32              | >32 | >64              | 16               | >32 | ≤0.063 | ≤0.063 | >128 |
| <b>G200 -8</b>   | >16 | >16 | >32 | >32              | ≤0.5 | >32              | 32  | 64               | 16               | >32 | ≤0.063 | ≤0.063 | >128 |
| <b>G500 -1</b>   | >16 | 8   | 16  | 16               | ≤0.5 | >32              | 4   | 16               | 16               | >32 | ≤0.063 | ≤0.063 | >128 |
| <b>G500 -2</b>   | >16 | 16  | >32 | >32              | ≤0.5 | >32              | 8   | 16               | 8                | >32 | ≤0.063 | ≤0.063 | >128 |
| <b>G500 -3</b>   | >16 | 8   | 16  | 32               | ≤0.5 | >32              | 8   | 16               | 16               | >32 | ≤0.063 | ≤0.063 | >128 |
| <b>G500 -4</b>   | >16 | 8   | 32  | >32              | ≤0.5 | >32              | 8   | 64               | 16               | >32 | ≤0.063 | ≤0.063 | >128 |
| <b>102/04 K2</b> | >16 | >16 | >32 | >32              | ≤0.5 | >32              | >32 | >64              | 8                | >32 | ≤0.063 | ≤0.063 | >128 |
| <b>G200 -1</b>   | >16 | >16 | >32 | >32              | ≤0.5 | >32              | >32 | >64              | <4               | >32 | ≤0.063 | ≤0.063 | >128 |
| <b>G200 -2</b>   | >16 | >16 | >32 | >32              | ≤0.5 | >32              | >32 | >64              | <4               | >32 | ≤0.063 | ≤0.063 | >128 |
| <b>G200 -5</b>   | >16 | >16 | >32 | >32              | ≤0.5 | >32              | >32 | 64               | <4               | >32 | ≤0.063 | ≤0.063 | >128 |
| <b>G200 -8</b>   | >16 | >16 | >32 | >32              | ≤0.5 | >32              | >32 | >64              | <4               | >32 | ≤0.063 | ≤0.063 | >128 |
| <b>G500 -1</b>   | >16 | 4   | 4   | 32               | ≤0.5 | >32              | 4   | 8                | <4               | >32 | ≤0.063 | ≤0.063 | >128 |
| <b>G500 -2</b>   | >16 | >16 | >32 | >32              | ≤0.5 | >32              | >32 | >64              | <4               | >32 | ≤0.063 | ≤0.063 | >128 |
| <b>G500 -3</b>   | >16 | >16 | >32 | >32              | ≤0.5 | >32              | >32 | >64              | <4               | >32 | ≤0.063 | ≤0.063 | >128 |
| <b>G500 -4</b>   | >16 | 16  | 32  | >32              | ≤0.5 | >32              | 16  | 32               | <4               | >32 | ≤0.063 | ≤0.063 | >128 |
| <b>252/09 K3</b> | >16 | 16  | >32 | >32              | ≤0.5 | ≤2               | ≤2  | ≤4               | 8                | 8   | ≤0.063 | ≤0.063 | ≤4   |
| <b>G200 -1</b>   | >16 | 16  | >32 | >32              | 4    | 4                | 4   | 8                | 16               | 8   | ≤0.063 | ≤0.063 | ≤4   |
| <b>G200 -2</b>   | >16 | 16  | >32 | >32              | 1    | 4                | 4   | 8                | 16               | 8   | ≤0.063 | ≤0.063 | ≤4   |
| <b>G200 -3</b>   | >16 | 16  | 32  | >32              | 1    | 4                | 4   | ≤4               | 8                | 8   | ≤0.063 | ≤0.063 | ≤4   |
| <b>G200 -4</b>   | >16 | 4   | 8   | >32              | 2    | ≤2               | 4   | 8                | 16               | 8   | ≤0.063 | ≤0.063 | ≤4   |
| <b>G500 -1</b>   | >16 | 2   | 8   | 32               | ≤0.5 | ≤2               | ≤2  | ≤4               | 8                | 8   | ≤0.063 | ≤0.063 | ≤4   |
| <b>G500 -2</b>   | >16 | 4   | 8   | 16               | ≤0.5 | ≤2               | ≤2  | ≤4               | 8                | 8   | ≤0.063 | ≤0.063 | ≤4   |
| <b>G500 -3</b>   | >16 | 2   | 16  | 32               | ≤0.5 | ≤2               | ≤2  | ≤4               | 8                | 8   | ≤0.063 | ≤0.063 | ≤4   |
| <b>G500 -4</b>   | >16 | 16  | >32 | >32              | 4    | 8                | 4   | 8                | 16               | 8   | ≤0.063 | ≤0.063 | ≤4   |
| <b>104/15 K3</b> | >16 | >16 | 32  | 16               | 8    | 8                | 4   | 8                | 8                | >32 | ≤0.063 | ≤0.063 | ≤4   |
| <b>G200 -1</b>   | >16 | >16 | 32  | 16               | >8   | 16               | <2  | <4               | 16               | >32 | ≤0.063 | ≤0.063 | ≤4   |
| <b>G200 -2</b>   | >16 | >16 | 32  | 8                | >8   | 8                | 8   | 8                | 16               | >32 | ≤0.063 | ≤0.063 | ≤4   |
| <b>G200 -3</b>   | >16 | >16 | 32  | 8                | >8   | 8                | 4   | <4               | 16               | >32 | ≤0.063 | ≤0.063 | ≤4   |
| <b>G200 -4</b>   | >16 | >16 | >32 | 32               | >8   | 8                | <2  | <4               | 16               | >32 | ≤0.063 | ≤0.063 | ≤4   |
| <b>G500 -1</b>   | >16 | >16 | 32  | 16               | >8   | 4                | ≤2  | ≤4               | 8                | >32 | ≤0.063 | ≤0.063 | ≤4   |
| <b>G500 -2</b>   | >16 | >16 | >32 | 8                | >8   | 8                | 4   | ≤4               | 8                | >32 | ≤0.063 | ≤0.063 | ≤4   |
| <b>G500 -3</b>   | >16 | >16 | 32  | 8                | >8   | 16               | ≤2  | ≤4               | 16               | >32 | ≤0.063 | ≤0.063 | ≤4   |
| <b>G500 -4</b>   | >16 | >16 | 32  | 8                | >8   | 8                | ≤2  | ≤4               | 16               | >32 | ≤0.063 | ≤0.063 | ≤4   |

| Isolate   | AMP | CTA | CTZ | CXI <sup>1</sup> | GEN  | KAN <sup>1</sup> | AMI | STR <sup>1</sup> | NAL <sup>1</sup> | CMP | CIP    | MER    | TRS  |
|-----------|-----|-----|-----|------------------|------|------------------|-----|------------------|------------------|-----|--------|--------|------|
| RS165 K1  | >16 | >16 | ≤2  | 2-16             | ≤0.5 | ≤2               | ≤2  | ≤4               | 8                | 8   | ≤0.063 | ≤0.063 | ≤4   |
| G200 -1   | >16 | 16  | ≤2  | 4                | ≤0.5 | ≤2               | ≤2  | ≤4               | 8                | 8   | ≤0.063 | ≤0.063 | ≤4   |
| G200 -2   | >16 | 8   | ≤2  | 8                | ≤0.5 | ≤2               | ≤2  | ≤4               | 8                | 8   | ≤0.063 | ≤0.063 | ≤4   |
| G200 -3   | >16 | 16  | ≤2  | 4                | ≤0.5 | ≤2               | ≤2  | ≤4               | 8                | 8   | ≤0.063 | ≤0.063 | ≤4   |
| G200 -4   | >16 | 16  | ≤2  | 4                | ≤0.5 | ≤2               | ≤2  | ≤4               | 16               | 8   | ≤0.063 | ≤0.063 | ≤4   |
| G500 -1   | >16 | >16 | <2  | 8                | ≤0.5 | 4                | 4   | <4               | 8                | 8   | ≤0.063 | ≤0.063 | ≤4   |
| G500 -2   | >16 | >16 | 4   | 4                | ≤0.5 | <2               | <2  | <4               | 16               | 8   | ≤0.063 | ≤0.063 | ≤4   |
| G500 -3   | >16 | >16 | <2  | 8                | 2    | 4                | <2  | 8                | 8                | 8   | ≤0.063 | ≤0.063 | ≤4   |
| G500 -4   | >16 | >16 | <2  | 8                | 2    | 4                | 4   | <4               | 8                | 8   | ≤0.063 | ≤0.063 | ≤4   |
| 151/09 K2 | >16 | >16 | >32 | >32              | 4    | >32              | >32 | >64              | 8                | 8   | ≤0.063 | 1      | >128 |
| G200 -1   | >16 | >16 | >32 | >32              | 1    | 32               | 32  | >64              | 16               | 8   | ≤0.063 | 2      | >128 |
| G200 -2   | >16 | >16 | >32 | >32              | 4    | 32               | 16  | >64              | 16               | 8   | ≤0.063 | 4      | >128 |
| G200 -3   | >16 | >16 | >32 | >32              | 8    | 32               | >32 | >64              | 16               | 8   | ≤0.063 | 4      | >128 |
| G200 -4   | >16 | >16 | >32 | >32              | 4    | 32               | 32  | >64              | 16               | 8   | ≤0.063 | 4      | >128 |
| G500 -1   | >16 | >16 | >32 | >32              | 1    | >32              | 4   | >64              | 8                | 8   | ≤0.063 | 0.5    | >128 |
| G500 -2   | >16 | >16 | >32 | >32              | <0.5 | >32              | 4   | 4                | 8                | 8   | ≤0.063 | 0.25   | >128 |
| G500 -3   | >16 | >16 | 32  | >32              | <0.5 | >32              | <2  | 16               | <4               | <4  | ≤0.063 | 0.125  | >128 |
| G500 -4   | >16 | >16 | 32  | >32              | 1    | >32              | 16  | >64              | 16               | 8   | ≤0.063 | 1      | >128 |
| 346/12 K2 | >16 | ≤1  | ≤2  | 2-16             | ≤0.5 | 4                | ≤2  | 8                | 8                | 8   | ≤0.063 | 0.25   | ≤4   |
| G200 -1   | >16 | ≤1  | ≤2  | 4                | 1    | ≤2               | ≤2  | ≤4               | 8                | 8   | ≤0.063 | ≤0.063 | ≤4   |
| G200 -2   | >16 | <1  | <2  | 8                | ≤0.5 | <2               | ≤2  | <4               | 8                | 8   | ≤0.063 | 0.125  | ≤4   |
| G200 -3   | >16 | <1  | <2  | 4                | ≤0.5 | <2               | ≤2  | <4               | 16               | 8   | ≤0.063 | 0.25   | ≤4   |
| G200 -4   | >16 | <1  | <2  | 4                | ≤0.5 | 2                | ≤2  | <4               | 16               | 8   | ≤0.063 | 0.25   | ≤4   |
| G500 -1   | >16 | <1  | <2  | 4                | ≤0.5 | <2               | ≤2  | <4               | 8                | 8   | ≤0.063 | 0.25   | ≤4   |
| G500 -2   | >16 | <1  | <2  | 8                | ≤0.5 | <2               | ≤2  | <4               | 16               | 8   | ≤0.063 | 0.125  | ≤4   |
| G500 -3   | >16 | <1  | <2  | 4                | ≤0.5 | <2               | ≤2  | <4               | 8                | 8   | ≤0.063 | 0.125  | <4   |
| G500 -4   | >16 | <1  | <2  | 8                | <0.5 | <2               | <2  | <4               | 8                | 8   | ≤0.063 | ≤0.063 | <4   |

Legend: All abbreviations according to EUCAST<sup>1</sup> for these substances only ECOFF values are available ([https://www.eucast.org/mic\\_distributions\\_and\\_ecoffs/](https://www.eucast.org/mic_distributions_and_ecoffs/))-[https://www.eucast.org/fileadmin/src/media/PDFs/EUCAST\\_files/Disk\\_test\\_documents/Disk\\_abbreviations/EUCAST\\_system\\_for\\_antimicrobial\\_abbreviations.pdf](https://www.eucast.org/fileadmin/src/media/PDFs/EUCAST_files/Disk_test_documents/Disk_abbreviations/EUCAST_system_for_antimicrobial_abbreviations.pdf)

**Supplementary Table S4:** Results of *de novo* Assembly of the reads of isolates 102/04 K1 G<sub>0</sub> und K2 G<sub>0</sub>.

| Heading           | 102/04K1 <sup>1</sup> | p102/04K1 <sup>1</sup> | 102/04K2 <sup>1</sup> | p102/04K2 <sup>1</sup> | 102/04K1 G <sub>500-1</sub> | p102/04K1 G <sub>500-1</sub> |
|-------------------|-----------------------|------------------------|-----------------------|------------------------|-----------------------------|------------------------------|
| <b>Size</b>       | 4,687,587             | 164,040                | 4,685,473             | 164,040                | 4,690,582                   | 165,381                      |
| <b>GC content</b> | 50.8 %                | 52.3 %                 | 50.8 %                | 52.3 %                 | 50.8 %                      | 52.8 %                       |
| <b>CDS</b>        | 4,495                 | 206                    | 4,493                 | 206                    | 4,498                       | 207                          |
| <b>rRNA</b>       | 22                    | -                      | 22                    | -                      | 22                          | -                            |
| <b>tRNA</b>       | 86                    | -                      | 86                    | -                      | 86                          | -                            |

Legend: <sup>1</sup> generation G<sub>0</sub>.

**Supplementary Table S5:** Results of read mapping of illumina data for evolved transconjugants of RS165 K1 onto the reference sequence of 102/04 K1 G<sub>0</sub>.

| Heading           | RS165K1<br>G <sub>0</sub> | pRS165K1<br>G <sub>0</sub> | RS165K1<br>G <sub>200-1</sub> | pRS165K1<br>G <sub>200-1</sub> | RS165K1<br>G <sub>200-3</sub> | pRS165K1<br>G <sub>200-3</sub> | RS165K1<br>G <sub>500-3</sub> | pRS165K1<br>G <sub>500-3</sub> |
|-------------------|---------------------------|----------------------------|-------------------------------|--------------------------------|-------------------------------|--------------------------------|-------------------------------|--------------------------------|
| <b>Size</b>       | 4,682,662                 | 70,269                     | 4,686,841                     | 70,269                         | 4,687,417                     | 70,269                         | 4,688,104                     | 70,269                         |
| <b>GC content</b> | 50.8 %                    | 52.3 %                     | 50.8 %                        | 52.3 %                         | 50.8 %                        | 52.3 %                         | 50.8 %                        | 52.3 %                         |
| <b>CDS</b>        | 4,508                     | 96                         | 4,511                         | 96                             | 4,512                         | 96                             | 4,512                         | 96                             |
| <b>rRNA</b>       | 22                        | -                          | 22                            | -                              | 22                            | -                              | 22                            | -                              |
| <b>tRNA</b>       | 86                        | -                          | 86                            | -                              | 86                            | -                              | 86                            | -                              |

**Supplementary Table S6:** Used PCR primer pairs in this study.

| Primer              | T <sub>a</sub><br>[°C] | nM<br>Multiplex | Product<br>size [bp] | Sequence<br>5'-->3'    | Reference |
|---------------------|------------------------|-----------------|----------------------|------------------------|-----------|
| blaVIM fwd          | 55                     |                 | 216                  | AGTGGTGAGTATCCGACAG    | 1         |
| blaVIM rev          |                        |                 |                      | ATGAAAGTGCCTGGAGAC     |           |
| ChuA fwd            | 55                     | 200             | 279                  | GACGAACCAACGGTCAGGAT   | 2         |
| ChuA rev            |                        |                 |                      | TGCCGCCAGTACCAAAGACA   |           |
| CITM fwd            | 60                     |                 | 462                  | TGGCCAGAACTGACAGGCAAAA | 3         |
| CITM rev            |                        |                 |                      | TTTCTCCTGAACGTGGCTGGC  |           |
| CTX-M universal fwd | 55                     | 267             | 551                  | CGCTTTGCGATGTGCAG      | 5         |
| CTX-M universal rev |                        |                 |                      | ACCGCGATATCGTTGGT      |           |
| CTX-M-9 MP fwd      | 55                     | 200             | 356                  | GCAGTACAGCGACAATACCG   | 5         |
| CTX-M-9 MP rev      |                        |                 |                      | TATCATTGGTGGTGCCGTAG   |           |
| gndbis fwd          | 59                     |                 | 300                  | ATACCGACGACGCCGATCTG   | 6         |
| rfbO25b rev         |                        |                 |                      | TGCTATTCATTATGCGCAGC   |           |
| gndbis fwd          | 59                     |                 | 450                  | ATACCGACGACGCCGATCTG   | 6         |
| rfbO16 rev          |                        |                 |                      | GGATCATTTATGCTGGTACG   |           |
| KPCu fwd            | 58                     |                 | 533                  | CAGTCATTCAAGGGCTTTC    | 5         |
| KPCu rev            |                        |                 |                      | AGTCATTTGCCGTGCCATAC   |           |
| OXA-48 fwd          | 58                     |                 | 555                  | AAATCACAGGGCGTAGTTGTG  | 5         |
| OXA-48 rev          |                        |                 |                      | GACCCACCAGCCAATCTTAG   |           |
| SHV MP1 fwd         | 55                     | 267             | 750                  | TTCGCCTGTGTATTATCTCC   | 5         |
| SHV MP1 rev         |                        |                 |                      | TCCGCTCTGCTTTGTTATTC   |           |
| TEM universal fwd   | 55                     | 535             | 851                  | ATGAGTATTCAACATTTCGG   | 5         |
| TEM universal rev   |                        |                 |                      | TTAATCAGTGAGGCACCTAT   |           |
| TspE4C fwd          | 55                     | 267             | 152                  | GAGTAATGTCGGGGCATTCA   | 2         |
| TspE4C rev          |                        |                 |                      | CGCGCCAACAAAGTATTACG   |           |
| Yja fwd             | 55                     | 400             | 211                  | TGAAGTGTCAGGAGACGCTG   | 2         |
| Yja rev             |                        |                 |                      | ATGGAGAATGCGTTTCCTCAAC |           |

**References:** (1) Miriagou V, Tzelepi E, Gianneli D, Tzouveleki LS. *Escherichia coli* with a self-transferable, multiresistant plasmid coding for metallo-beta-lactamase VIM-1. *Antimicrob Agents Chemother.* 2003;47(1):395-7; (2) Clermont O, Bonacorsi S, Bingen E. Rapid and simple determination of the *Escherichia coli* phylogenetic group. *Appl Environ Microbiol.* 2000;66(8):4555; (3) Perez-Perez FJ, Hanson ND. Detection of plasmid-mediated AmpC beta-lactamase genes in clinical isolates by using multiplex PCR. *J Clin Microbiol.* 2002;40(6):2153-62; (5) Grobner S, Linke D, Schutz W, Fladerer C, Madlung J, Autenrieth IB, et al. Emergence of carbapenem-non-susceptible extended-spectrum beta-lactamase-producing *Klebsiella pneumoniae* isolates at the university hospital of Tübingen, Germany. *J Med Microbiol.* 2009;58(Pt 7):912-22; (6) Johnson JR, Clermont O, Johnston B, Clabots C, Tchesnokova V, Sokurenko E, et al. Rapid and specific detection, molecular epidemiology, and experimental virulence of the O16 subgroup within *Escherichia coli* sequence type 131. *J Clin Microbiol.* 2014;52(5):1358-65.



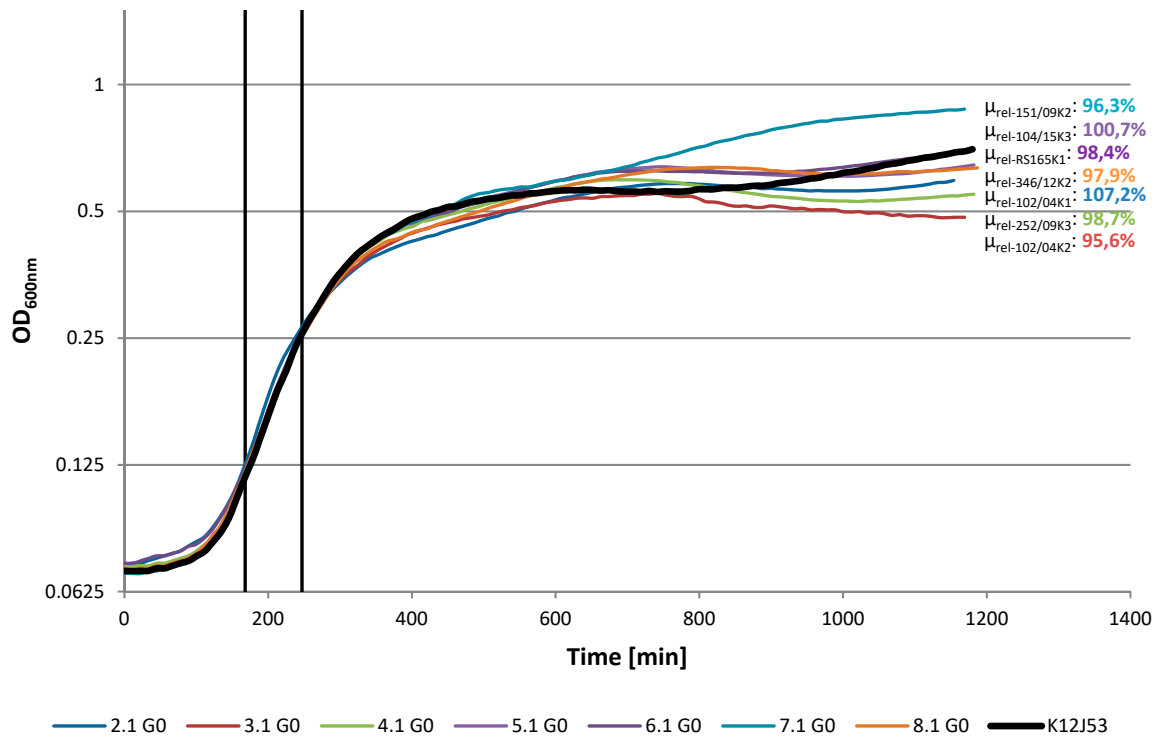

**Figure S1.** Growth curves of seven selected transconjugants with beta-lactamase gene carrying plasmids vs. the plasmid-free recipient *E. coli* J53 Azi<sup>r</sup>. The black vertical lines frame the area of exponential growth used to determine the growth rates.
